# Supplementary material
Source: PubMed Central journal article supplement (PMC6930359)
Supplement: NIHMS1541136-supplement-2.pdf [file NIHMS1541136-supplement-2.pdf]

**Supplemental Table 1. Exact p values for all posthoc statistical comparisons**

| <b>FIGURE #</b>                    | <b>TEST</b>      | <b>COMPARISON</b>                                         | <b>P VALUE</b> |
|------------------------------------|------------------|-----------------------------------------------------------|----------------|
| <b>Fig 1b</b>                      | two-way ANOVA    | 1WD active vs 45WD active                                 | 0.001          |
|                                    |                  | 1WD inactive vs 45 WD inactive                            | 0.5304         |
| <b>Fig 1h</b>                      | t-test           | saline 1WD vs cocaine 1WD                                 | 0.0412         |
|                                    | one-way ANOVA    | saline 45WD vs Cocaine 45WD                               | 1              |
|                                    |                  | saline 45WD vs Cocaine 45WD naspm                         | 0.0168         |
|                                    |                  | Cocaine 45WD vs Cocaine 45WD naspm                        | 0.0023         |
| <b>Fig 1m</b>                      | one-way ANOVA    | Saline re-exp vs. Cocaine 45WD                            | 1              |
|                                    |                  | Saline re-exp vs. Cocaine 45WD naspm                      | 0.023          |
|                                    |                  | Saline re-exp vs. Cocaine re-exp                          | 0.0075         |
|                                    |                  | Saline re-exp vs. Cocaine re-exp naspm                    | 0.0362         |
|                                    |                  | Cocaine 45WD vs. Cocaine 45WD naspm                       | 0.001          |
|                                    |                  | Cocaine 45WD vs. Cocaine re-exp                           | <0.0001        |
|                                    |                  | Cocaine 45WD vs. Cocaine Re-exp naspm                     | 0.0016         |
|                                    |                  | Cocaine 45WD naspm vs. Cocaine re-exp                     | 1              |
|                                    |                  | Cocaine 45WD naspm vs. Cocaine re-exp naspm               | 1              |
|                                    |                  | Cocaine re-exp vs. Cocaine Re-exp naspm                   | 1              |
| <b>Fig 1n</b>                      | two-way RM ANOVA | cocaine vs saline 1-7min for each time                    | 1              |
|                                    |                  | cocaine vs saline 15-24min for each time                  | <0.0001        |
|                                    |                  | cocaine vs saline 32-41min for each time                  | 1              |
| <b>Fig 1o</b>                      | two-way RM ANOVA | saline 45WD vs Cocaine 45 WD 1-31 min for each time       | 1              |
|                                    |                  | saline 45WD vs Cocaine 45 WD 32 min                       | 0.1917         |
|                                    |                  | saline 45WD vs Cocaine 45 WD 33 min                       | 0.2829         |
|                                    |                  | saline 45WD vs Cocaine 45 WD 34-41 min for each time      | 1              |
|                                    |                  | cocaine 45WD vs cocaine re-exp 1-31 min for each time     | 1              |
|                                    |                  | cocaine45WD vs Cocaine re-exp WD 32 min                   | 0.177          |
|                                    |                  | cocaine45WD vs Cocaine re-exp WD 33 min                   | 0.2537         |
|                                    |                  | cocaine45WD vs Cocaine re-exp WD 34-41 min for each time  | 1              |
|                                    |                  | saline 45WD vs cocaine re-exposure 1-41 min for each time | 1              |
|                                    |                  | <b>Fig 1q Left</b>                                        | two-way ANOVA  |
| (-) 70mV saline vs cocaine re-exp  | 1                |                                                           |                |
| (-) 70mV cocaine vs cocaine re-exp | 1                |                                                           |                |
| 0mV saline vs cocaine              | 1                |                                                           |                |
| 0mV saline vs cocaine re-exp       | 1                |                                                           |                |
| 0mV cocaine vs cocaine re-exp      | 1                |                                                           |                |

| FIGURE #            | TEST          | COMPARISON                              | P VALUE |
|---------------------|---------------|-----------------------------------------|---------|
|                     |               | 50mV saline vs cocaine                  | <0.0001 |
|                     |               | 50mV saline vs cocaine re-exp           | 0.2132  |
|                     |               | 50mV cocaine vs cocaine re-exp          | 0.0142  |
| <b>Fig 1q Right</b> | one-way ANOVA | saline vs cocaine                       | 0.0104  |
|                     |               | saline vs cocaine re-exp                | 1       |
|                     |               | cocaine vs cocaine re-exp               | 0.0196  |
| <b>Fig 1v</b>       | one-way ANOVA | 10 min vs. 2hr                          | 1       |
|                     |               | 10 min vs. 4hr                          | 1       |
|                     |               | 10 min vs. 6hr                          | 0.0186  |
|                     |               | 10 min vs. 6hr naspm                    | 1       |
|                     |               | 2hr vs. 4hr                             | 1       |
|                     |               | 2hr vs. 6hr                             | 0.0393  |
|                     |               | 2hr vs. 6hr naspm                       | 1       |
|                     |               | 4hr vs. 6hr                             | 0.9214  |
|                     |               | 4hr vs. 6hr naspm                       | 0.6502  |
|                     |               | 6hr vs. 6hr naspm                       | 0.0062  |
| <b>Fig 2d</b>       | one-way ANOVA | Saline vs. Cocaine 45w/d                | 0.0065  |
|                     |               | Saline vs. Cocaine re-exp               | 0.0113  |
|                     |               | Saline vs. Cocaine 6hr post cue         | 0.0309  |
|                     |               | Cocaine 45w/d vs. Cocaine re-exp        | 1       |
|                     |               | Cocaine 45w/d vs. Cocaine 6hr post cue  | 1       |
|                     |               | Cocaine re-exp vs. Cocaine 6hr post cue | 1       |
| <b>Fig 2e</b>       | one-way ANOVA | Saline vs. Cocaine 45w/d                | 0.0009  |
|                     |               | Saline vs. Cocaine re-exp               | 1       |
|                     |               | Saline vs. Cocaine 6hr post cue         | 0.0002  |
|                     |               | Cocaine 45w/d vs. Cocaine re-exp        | 0.0003  |
|                     |               | Cocaine 45w/d vs. Cocaine 6hr post cue  | 0.878   |
|                     |               | Cocaine re-exp vs. Cocaine 6hr post cue | <0.0001 |
| <b>Fig 2f</b>       | one-way ANOVA | Saline vs. Cocaine 45w/d                | 0.7114  |
|                     |               | Saline vs. Cocaine re-exp               | 0.0025  |
|                     |               | Saline vs. Cocaine 6hr post cue         | 1       |
|                     |               | Cocaine 45w/d vs. Cocaine re-exp        | 0.0341  |
|                     |               | Cocaine 45w/d vs. Cocaine 6hr post cue  | 1       |
|                     |               | Cocaine re-exp vs. Cocaine 6hr post cue | 0.0145  |
| <b>Fig 2g</b>       | one-way ANOVA | Saline vs. Cocaine 45w/d                | 0.0057  |
|                     |               | Saline vs. Cocaine re-exp               | 0.0029  |
|                     |               | Saline vs. Cocaine 6hr post cue         | 1       |
|                     |               | Cocaine 45w/d vs. Cocaine re-exp        | 1       |

| FIGURE #                         | TEST          | COMPARISON                              | P VALUE |
|----------------------------------|---------------|-----------------------------------------|---------|
|                                  |               | Cocaine 45w/d vs. Cocaine 6hr post cue  | 0.1154  |
|                                  |               | Cocaine re-exp vs. Cocaine 6hr post cue | 0.0614  |
| <b>Fig 2h Right</b>              | one-way ANOVA | Saline vs. Cocaine 45w/d                | 0.0199  |
|                                  |               | Saline vs. Cocaine re-exp               | 1       |
|                                  |               | Saline vs. Cocaine 6hr post cue         | 0.0092  |
|                                  |               | Cocaine 45w/d vs. Cocaine re-exp        | 0.0003  |
|                                  |               | Cocaine 45w/d vs. Cocaine 6hr post cue  | 1       |
|                                  |               | Cocaine re-exp vs. Cocaine 6hr post cue | 0.0003  |
| <b>Fig 3f</b>                    | one-way ANOVA | saline AGL vs. saline TGL               | 1       |
|                                  |               | saline AGL vs. cocaine AGL              | 1       |
|                                  |               | saline AGL vs. cocaine AGL nasm         | 0.0002  |
|                                  |               | saline AGL vs. cocaine TGL              | 0.0002  |
|                                  |               | saline AGL vs. cocaine TGL nasm         | 0.0106  |
|                                  |               | saline TGL vs. cocaine AGL              | 1       |
|                                  |               | saline TGL vs. cocaine AGL nasm         | 0.0003  |
|                                  |               | saline TGL vs. cocaine TGL              | 0.0002  |
|                                  |               | saline TGL vs. cocaine TGL nasm         | 0.0139  |
|                                  |               | cocaine AGL vs. cocaine AGL nasm        | 0.001   |
|                                  |               | cocaine AGL vs. cocaine TGL             | 0.0007  |
|                                  |               | cocaine AGL vs. cocaine TGL nasm        | 0.0406  |
|                                  |               | cocaine AGL nasm vs. cocaine TGL        | 1       |
|                                  |               | cocaine AGL nasm vs. cocaine TGL nasm   | 1       |
| cocaine TGL vs. cocaine TGL nasm | 1             |                                         |         |
| <b>Fig 3h</b>                    | one-way ANOVA | Saline AGL vs. Saline TGL               | 1       |
|                                  |               | Saline AGL vs. Cocaine AGL              | 0.0003  |
|                                  |               | Saline AGL vs. Cocaine TGL              | 0.0002  |
|                                  |               | Saline TGL vs. Cocaine AGL              | 0.0001  |
|                                  |               | Saline TGL vs. Cocaine TGL              | <0.0001 |
|                                  |               | Cocaine AGL vs. Cocaine TGL             | 1       |
| <b>Fig 3i</b>                    | one-way ANOVA | Saline AGL vs. Saline TGL               | 1       |
|                                  |               | Saline AGL vs. Cocaine AGL              | <0.0001 |
|                                  |               | Saline AGL vs. Cocaine TGL              | 1       |
|                                  |               | Saline TGL vs. Cocaine AGL              | <0.0001 |
|                                  |               | Saline TGL vs. Cocaine TGL              | 0.5263  |
|                                  |               | Cocaine AGL vs. Cocaine TGL             | <0.0001 |
| <b>Fig 3j</b>                    | one-way ANOVA | Saline AGL vs. Saline TGL               | 1       |
|                                  |               | Saline AGL vs. Cocaine AGL              | 0.6523  |
|                                  |               | Saline AGL vs. Cocaine TGL              | <0.0001 |

| FIGURE #                                                 | TEST             | COMPARISON                                           | P VALUE |
|----------------------------------------------------------|------------------|------------------------------------------------------|---------|
|                                                          |                  | Saline TGL vs. Cocaine AGL                           | 0.5058  |
|                                                          |                  | Saline TGL vs. Cocaine TGL                           | <0.0001 |
|                                                          |                  | Cocaine AGL vs. Cocaine TGL                          | <0.0001 |
| <b>Fig 3k</b>                                            | one-way ANOVA    | Saline AGL vs. Saline TGL                            | 1       |
|                                                          |                  | Saline AGL vs. Cocaine AGL                           | 0.0787  |
|                                                          |                  | Saline AGL vs. Cocaine TGL                           | 1       |
|                                                          |                  | Saline TGL vs. Cocaine AGL                           | 0.0125  |
|                                                          |                  | Saline TGL vs. Cocaine TGL                           | 0.6761  |
|                                                          |                  | Cocaine AGL vs. Cocaine TGL                          | 0.1673  |
|                                                          |                  |                                                      |         |
| <b>Fig 3l</b>                                            | one-way ANOVA    | Saline AGL vs. Saline TGL                            | 1       |
|                                                          |                  | Saline AGL vs. Cocaine AGL                           | 0.0042  |
|                                                          |                  | Saline AGL vs. Cocaine TGL                           | 1       |
|                                                          |                  | Saline TGL vs. Cocaine AGL                           | 0.0035  |
|                                                          |                  | Saline TGL vs. Cocaine TGL                           | 1       |
|                                                          |                  | Cocaine AGL vs. Cocaine TGL                          | 0.0005  |
| <b>Fig 3m</b>                                            | two-way RM ANOVA | AGL active vs TGL active                             | <0.0001 |
|                                                          |                  | AGL inactive vs TGL inactive                         | 0.1648  |
| <b>Fig 3n</b>                                            | two-way RM ANOVA | AGL active vs TGL active                             | 1       |
|                                                          |                  | AGL inactive vs TGL inactive                         | 1       |
| <b>Fig 4a</b>                                            | one-way ANOVA    | saline withdrawal vs. saline reactivated             | 1       |
|                                                          |                  | saline withdrawal vs. cocaine withdrawal             | 1       |
|                                                          |                  | saline withdrawal vs. cocaine reactivated-10 min     | 0.0123  |
|                                                          |                  | saline withdrawal vs. cocaine 75 post react          | 0.0021  |
|                                                          |                  | saline withdrawal vs. cocaine reactivated 6 hr       | 1       |
|                                                          |                  | saline withdrawal vs. cocaine reactivated 24 hr      | 1       |
|                                                          |                  | saline reactivated vs. cocaine withdrawal            | 1       |
|                                                          |                  | saline reactivated vs. cocaine reactivated-10 min    | 0.0383  |
|                                                          |                  | saline reactivated vs. cocaine 75 post react         | 0.0075  |
|                                                          |                  | saline reactivated vs. cocaine reactivated 6 hr      | 1       |
|                                                          |                  | saline reactivated vs. cocaine reactivated 24 hr     | 1       |
|                                                          |                  | cocaine withdrawal vs. cocaine reactivated-10 min    | 0.0136  |
|                                                          |                  | cocaine withdrawal vs. cocaine 75 post react         | 0.0021  |
|                                                          |                  | cocaine withdrawal vs. cocaine reactivated 6 hr      | 1       |
|                                                          |                  | cocaine withdrawal vs. cocaine reactivated 24 hr     | 1       |
|                                                          |                  | cocaine reactivated-10 min vs. cocaine 75 post react | 1       |
| cocaine reactivated-10 min vs. cocaine reactivated 6 hr  | 0.0004           |                                                      |         |
| cocaine reactivated-10 min vs. cocaine reactivated 24 hr | 0.0179           |                                                      |         |

| FIGURE #      | TEST             | COMPARISON                                             | P VALUE |
|---------------|------------------|--------------------------------------------------------|---------|
|               |                  | cocaine 75 post react vs. cocaine reactivated 6 hr     | <0.0001 |
|               |                  | cocaine 75 post react vs. cocaine reactivated 24 hr    | 0.0032  |
|               |                  | cocaine reactivated 6 hr vs. cocaine reactivated 24 hr | 1       |
| <b>Fig 4h</b> | one-way ANOVA    | saline dnRac1 vs. cocaine non-trans                    | 1       |
|               |                  | saline dnRac vs. cocaine non-trans naspm               | 0.0006  |
|               |                  | saline dnRac1 vs. cocaine dnRac1                       | <0.0001 |
|               |                  | saline dnRac1 vs. cocaine dnRac1 naspm                 | 0.0013  |
|               |                  | cocaine non-trans vs. cocaine non-trans naspm          | 0.0007  |
|               |                  | cocaine non-trans vs. cocaine dnRac1                   | <0.0001 |
|               |                  | cocaine non-trans vs. cocaine dnRac1 naspm             | 0.0014  |
|               |                  | cocaine non-trans naspm vs. cocaine dnRac              | 1       |
|               |                  | cocaine non-trans naspm vs. cocaine dnRac1 naspm       | 1       |
|               |                  | cocaine dnRac1 vs. cocaine dnRac1 naspm                | 1       |
| <b>Fig 4o</b> | one-way ANOVA    | Saline vs. Cocaine                                     | 0.001   |
|               |                  | Saline vs. Cocaine+naspm                               | 0.0036  |
|               |                  | Cocaine vs. Cocaine+naspm                              | 1       |
| <b>Fig 4q</b> | two-way RM ANOVA | dnRac1 active vs dnRac1 re-exp active                  | 0.0003  |
|               |                  | dnRac1 inactive vs dnRac1 re-exp inactive              | 1       |
| <b>Fig 5e</b> | one-way ANOVA    | saline caRac1 vs. cocaine non-trans                    | 0.0003  |
|               |                  | saline caRac1 vs. cocaine non-trans naspm              | 0.042   |
|               |                  | saline caRac1 vs. cocaine caRac1                       | 1       |
|               |                  | saline caRac1 vs. cocaine caRac1 naspm                 | 0.0188  |
|               |                  | cocaine non-trans vs. cocaine non-trans naspm          | 1       |
|               |                  | cocaine non-trans vs. cocaine caRac1                   | 0.0002  |
|               |                  | cocaine non-trans vs. cocaine caRac1 naspm             | 1       |
|               |                  | cocaine non-trans naspm vs. cocaine caRac1             | 0.0253  |
|               |                  | cocaine non-trans naspm vs. cocaine caRac1 naspm       | 1       |
|               |                  | cocaine caRac1 vs. cocaine caRac1 naspm                | 0.0116  |
| <b>Fig 5l</b> | one-way ANOVA    | saline vs. cocaine                                     | 1       |
|               |                  | saline vs. cocaine naspm                               | 0.0034  |
|               |                  | cocaine vs. cocaine naspm                              | 0.0008  |
| <b>Fig 5n</b> | two-way RM ANOVA | saline non-trans vs saline trans                       | 1       |
|               |                  | cocaine non-trans vs cocaine trans                     | 1       |
|               |                  | saline non-trans vs cocaine non-trans                  | <0.0001 |
|               |                  | saline trans vs cocaine trans                          | <0.0001 |
| <b>Fig 5o</b> | two-way RM ANOVA | saline non-trans vs saline trans                       | 0.0221  |
|               |                  | cocaine non-trans vs cocaine trans                     | <0.0001 |

| FIGURE #      | TEST             | COMPARISON                            | P VALUE |
|---------------|------------------|---------------------------------------|---------|
|               |                  | saline non-trans vs cocaine non-trans | 0.0019  |
|               |                  | saline trans vs cocaine trans         | <0.0001 |
| <b>Fig 5p</b> | two-way RM ANOVA | saline non-trans vs saline trans      | 0.0287  |
|               |                  | cocaine non-trans vs cocaine trans    | <0.0001 |
|               |                  | saline non-trans vs cocaine non-trans | <0.0001 |
|               |                  | saline trans vs cocaine trans         | 0.013   |
| <b>Fig 5q</b> | two-way RM ANOVA | saline non-trans vs saline trans      | 0.8302  |
|               |                  | cocaine non-trans vs cocaine trans    | 0.3651  |
|               |                  | saline non-trans vs cocaine non-trans | 0.0132  |
|               |                  | saline trans vs cocaine trans         | 0.0003  |
| <b>Fig 5r</b> | two-way RM ANOVA | saline non-trans vs saline trans      | 0.0347  |
|               |                  | cocaine non-trans vs cocaine trans    | <0.0001 |
|               |                  | saline non-trans vs cocaine non-trans | 1       |
|               |                  | saline trans vs cocaine trans         | <0.0001 |
| <b>Fig 5v</b> | t-test           | cocaine vehicle vs cocaine LIMKi      | 0.0023  |
| <b>Fig 6f</b> | one-way ANOVA    | saline vs. cocaine                    | 0.0151  |
|               |                  | saline vs. cocaine naspm              | 0.0097  |
|               |                  | cocaine vs. cocaine naspm             | 1       |
| <b>Fig 6h</b> | two-way RM ANOVA | saline non-trans vs saline trans      | 1       |
|               |                  | cocaine non-trans vs cocaine trans    | 1       |
|               |                  | saline non-trans vs cocaine non-trans | <0.0001 |
|               |                  | saline trans vs cocaine trans         | <0.0001 |
| <b>Fig 6i</b> | two-way RM ANOVA | saline non-trans vs saline trans      | 1       |
|               |                  | cocaine non-trans vs cocaine trans    | 0.0003  |
|               |                  | saline non-trans vs cocaine non-trans | <0.0001 |
|               |                  | saline trans vs cocaine trans         | 0.0269  |
| <b>Fig 6j</b> | two-way RM ANOVA | saline non-trans vs saline trans      | 0.5388  |
|               |                  | cocaine non-trans vs cocaine trans    | 0.0006  |
|               |                  | saline non-trans vs cocaine non-trans | 0.0517  |
|               |                  | saline trans vs cocaine trans         | <0.0001 |
| <b>Fig 6k</b> | two-way RM ANOVA | saline non-trans vs saline trans      | 0.7272  |
|               |                  | cocaine non-trans vs cocaine trans    | 1       |
|               |                  | saline non-trans vs cocaine non-trans | 0.0001  |
|               |                  | saline trans vs cocaine trans         | 0.0006  |
| <b>Fig 6l</b> | two-way RM ANOVA | saline non-trans vs saline trans      | 0.353   |

| FIGURE #       | TEST             | COMPARISON                            | P VALUE       |
|----------------|------------------|---------------------------------------|---------------|
|                |                  | cocaine non-trans vs cocaine trans    | 0.0005        |
|                |                  | saline non-trans vs cocaine non-trans | <0.0001       |
|                |                  | saline trans vs cocaine trans         | 0.0734        |
| <b>Fig 6p</b>  | t-test           | cocaine vehicle vs cocaine LIMKi      | <0.0001       |
| <b>Fig 6q</b>  | two-way RM ANOVA | C450 active vs pa-Rac1 active         | 0.4771        |
|                |                  | C450 inactive vs pa-Rac1 inactive     | 0.8386        |
| <b>Fig 6r</b>  | two-way RM ANOVA | C450 active vs pa-Rac1 active         | <0.0001       |
|                |                  | C450 inactive vs pa-Rac1 inactive     | 0.5046        |
| <b>Fig 6s</b>  | two-way RM ANOVA | C450 active vs pa-Rac1 active         | <0.0001       |
|                |                  | C450 inactive vs pa-Rac1 inactive     | 0.9827        |
| <b>Fig S3l</b> | one-way ANOVA    | Saline vs. Cue-rexp                   | 0.0001        |
|                |                  | Saline vs. 6hr post                   | 0.0002        |
|                |                  | Cue re-exp vs. 6hr post               | 1             |
| <b>Fig S4a</b> | two-way RM ANOVA | Control vs. APV (50-60min)            | <0.0001       |
|                |                  | Control vs. AGL (50-60min)            | 1             |
|                |                  | Control vs. TGL(50-60min)             | 0.0008-0.0317 |
|                |                  | APV vs. AGL (50-60min)                | <0.0001       |
|                |                  | APV vs. TGL (50-60min)                | 0.2029-1      |
|                |                  | AGL vs. TGL (50-60min)                | 0.0088-0.045  |
| <b>Fig S7h</b> | one-way ANOVA    | saline vs. cocaine                    | 1             |
|                |                  | saline vs. cocaine naspm              | <0.0001       |
|                |                  | cocaine vs. cocaine naspm             | <0.0001       |
